# Supplementary material for: Penicillium menonorum: A Novel Fungus to Promote Growth and Nutrient Management in Cucumber Plants
Source: PubMed Central journal article supplement — Mycobiology. 2015 Mar 31;43(1):49–56. doi: 10.5941/MYCO.2015.43.1.49 (PMC4397380; doi:10.5941/myco.2015.43.1.49), 2015-03-31

**Supplementary Fig. 1.** Characterization of plant growth promoting *Penicillium menonorum*: A, CAS agar plate detection of siderophores produced by KNU-3; B, P-solubilization in control vs. KNU-3 in Pikovskaya medium.

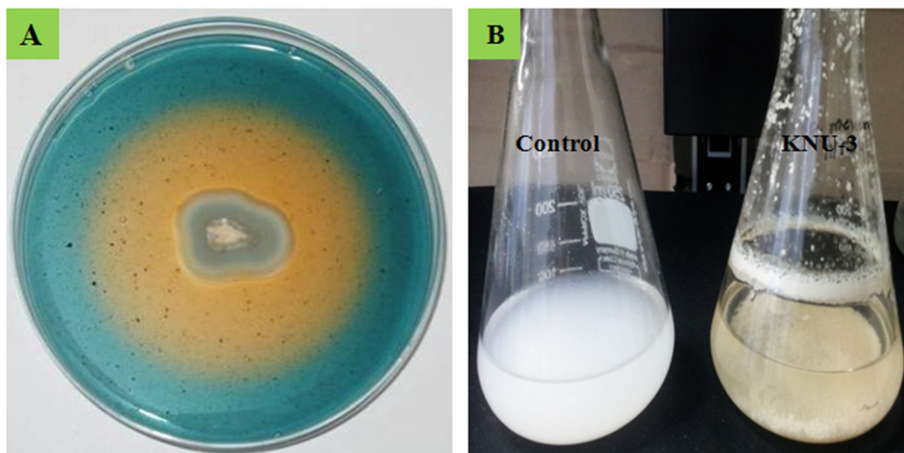

Supplement: mb-43-49-s001.pdf [file mb-43-49-s001.pdf]
